# Supplementary material
Source: Springer Nature journal article supplement (https://www.springermedizin.de/resource/supplementary/12987_2009_424_MOESM1_ESM.pdf/9612006)

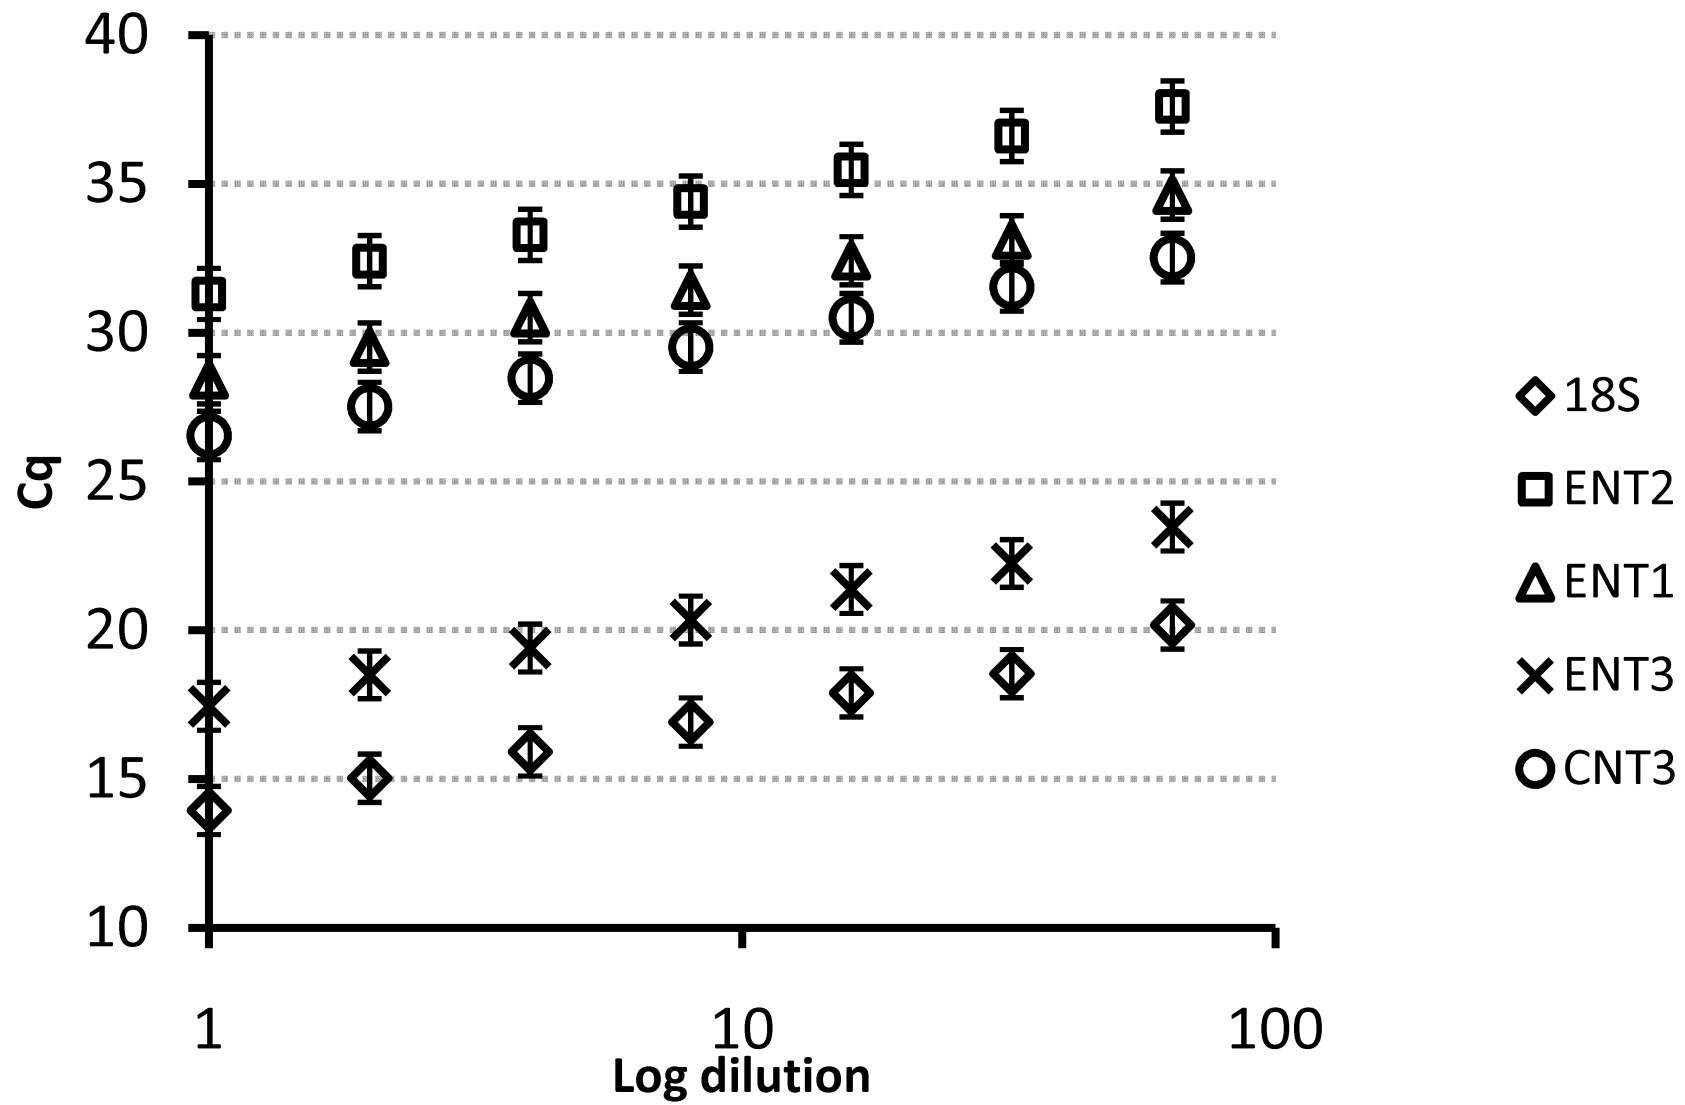

Supplement: MOESM1 [file 9612006]
